# Supplementary material for: Elevated levels of renal function tests conferred increased risks of developing various pregnancy complications and adverse perinatal outcomes: insights from a population-based cohort study
Source: publisher site journal article supplement (doi:10.1515/cclm-2023-0104), 2023-04-04
Supplement: Supplementary file 1 [file j_cclm-2023-0104_suppl_001.docx]

**Supplementary Tables**

**Supplementary Table 1** Demographic data and basic statistics of recruited healthy singleton and twin pregnant women

| Characteristics | singleton pregnancy (n=8831) | twin pregnancy (n=133) |
| --- | --- | --- |
| Age(years) | 31 (25-40) | 33 (26.35-39.65) |
| Pre-pregnancy BMI (kg/m2) | 21.97 (17.15-31.25) | 22.64 (17.73-33.28) |
| Gestational age | 39 (37-41) | 37 (37-39) |

All values were presented as median (25th-75th percentile).

**Supplemental Table 2** Diagnosis criteria of pregnancy complications and adverse prenatal outcomes

|  |  |  |  |  |  |  |  |  |  |  |  |
| --- | --- | --- | --- | --- | --- | --- | --- | --- | --- | --- | --- |
| Diseases | Definition | | | | | | | | | | |
|  |
| GH | Blood pressure elevation [systolic blood pressure≥140 mmHg or diastolic blood pressure+B12≥90 mmHg] at >20 weeks’ gestation in the absence of proteinuria (1). | | | | | | | | | | |  |
| GDM | In an oral glucose tolerance test (OGTT), every participant is requested for a 50 g glucose challenge test and serum glucose levels are assayed 1 h later. Subjects with positive results (glucose levels≥7.8 mmol/L) are required to undergo a 75 g OGTT. Serum glucose levels during OGTT are measured at 0, 1 and 2 h, respectively. The normal values are fasting glucose <5.1 mmol/L, 1-h glucose <10.0 mmol/L and 2-h glucose <8.5 mmol/L. GDM is diagnosed if one or more values equaled or exceeded the above thresholds (2). | | | | | | | | | | |  |
| PE | New-onset hypertension (systolic blood pressure≥140 mmHg or diastolic blood pressure≥90 mmHg) and new-onset proteinuria (300 mg of protein in 24 h or a urine protein/creatinine ratio of 0.3 mg/dl) after 20 weeks of gestation, in a previously normotensive woman (1). | | | | | | | | | | |  |
| ICP | ICP is diagnosed by the presence of abnormal liver function tests and raised maternal serum bile acids. Abnormal liver function tests include elevated levels of alanine aminotransferase, aspartate aminotransferase and/or gamma-glutamyl transpeptidase. The upper limits of total serum bile acids were 10–14 μmol/L in postprandial state and 6–10 μmol/L in fasting state (3). | | | | | | | | | | |  |
| PPH | Cumulative blood loss of≥1,000 mL or blood loss accompanied by signs and symptoms of hypovolemia within 24 hours following the birth process (4). | | | | | | | | | | |  |
| PTB | Usually defined as regular contractions accompanied by cervical change at less than 37 weeks' gestation (5). | | | | | | | | | | |  |
| PA | Defined as premature separation of a normally implanted placenta (6). | | | | | | | | | | |  |
| FGR | FGR is defined on the basis of the weight percentile relative to the gestational age. The World Health Organization (WHO) Defines FGR as an estimated fetal weight below the third percentile. However, the American College of Obstetrics and Gynecology (ACOG) defines FGR as an estimated fetal weight below the 10th percentile for gestational age and states that it is frequently associated with placental insufficiency. This is the most commonly used classification (7). | | | | | | | | | | |  |
| GH: gestational hypertension; GDM: gestational diabetes mellitus; PE: preeclampsia; ICP: intrahepatic cholestasis of pregnancy; PPH: postpartum hemorrhage. PTB: preterm birth; PA: placental abruption; FGR: fetal growth restriction. | | | | | | | | | | | |  |

**References**

1.Hypertension in pregnancy. Report of the American College of Obstetricians and Gynecologists' task force on hypertension in pregnancy. Obstet Gynecol. 2013;122(5):1122–31.

2.World Health Organization. Diagnostic criteria and classification of hyperglycemia first detected in pregnancy: a World Health Organization Guideline. Diabetes Res Clin Pract. 2014;103(3):341–63.

3.Williamson C, Geenes V. Intrahepatic cholestasis of pregnancy. Obstet Gynecol. 2014;124(1):120–33.

4.Practice Bulletin No. 183: Postpartum Hemorrhage. Committee on Practice Bulletins-Obstetrics. Obstet Gynecol. 2017;130(4):e168-e186.

5.Goldenberg RL, Culhane JF, Iams JD, Romero R. Epidemiology and causes of preterm birth. Lancet. 2008 Jan 5;371(9606):75-84.

6.Oyelese Y, Ananth CV. Placental abruption. Obstet Gynecol. 2006 Oct;108(4):1005-16.

7.American College of Obstetricians and Gynecologists' Committee on Practice Bulletins—Obstetrics and the Society for Maternal-FetalMedicin. ACOG Practice Bulletin No. 204: Fetal Growth Restriction. Obstet Gynecol. 2019 Feb;133(2):e97-e109.

**Supplementary Table 3** Demographic data and basic statistics of the serum renal function markers in patients with different outcomes

|  |  |  |  |  |
| --- | --- | --- | --- | --- |
| Disease Groups | Age (years) | Pre-pregnancy BMI (kg/m2) | BUN (mmol/L) |  |
| GH positive (N=1138, 3.9%) | 33 (26-42) | 25.35 (18.22-34.96) | 3.10 (1.82-4.77) | 1st trimester |
| GH negative (N=28190) | 32 (26-41) | 22.66 (17.31-32.32) | 3.03 (1.88-4.72) |
| p value | <0.001 | <0.001 | 0.015 |
| GDM positive (N=4623, 15.8) | 34 (27-42) | 24.02 (17.72-33.66) | 3.08 (1.90-4.80) | 1st trimester |
| GDM negative (N=24705) | 32 (26-40) | 22.58 (17.28-32.25) | 3.09 (1.88-4.70) |
| p value | <0.001 | <0.001 | <0.001 |
| PE positive (N=1467, 5.0%) | 33 (25-42) | 25.71 (18.17-37.38) | 3.04 (1.85-4.83) | 1st trimester |
| PE negative (N=27861) | 32 (26-41) | 22.66 (17.31-32.03) | 3.03 (1.88-4.72) |
| p value | <0.001 | <0.001 | 0.452 |
| ICP positive (N=130, 0.4%) | 32 (25-43) | 21.88 (16.62-34.36) | 3.31(1.84-5.00) | 1st trimester |
| ICP negative (N=29198) | 32 (26-41) | 22.77 (17.31-32.46) | 3.03 (1.88-4.72) |
| p value | 0.209 | 0.046 | 0.037 |
| PTB positive (N=1314, 4.5%) | 33 (26-42) | 23.14 (17.33-33.59) | 3.04 (1.90-4.79) | 1st trimester |
| PTB negative (N=28014) | 32 (26-41) | 22.77 (17.31-32.42) | 3.04 (1.88-4.72) |
| p value | <0.001 | 0.004 | 0.396 |
|  |  |  | 3.01 (1.73-6.62) | 3rd trimester |
|  |  |  | 2.81 (1.71-4.44) |
|  |  |  | <0.001 |
| FGR positive (N=711, 2.4%) | 32 (25-41) | 22.27 (16.65-31.18) | 3.10 (1.88-4.84) | 1st trimester |
| FGR negative (N=28617) | 32 (26-41) | 22.77 (17.36-32.51) | 3.03 (1.88-4.72) |
| p value | 0.03 | <0.001 | 0.009 |
|  |  |  | 3.17 (1.95-6.29) | 3rd trimester |
|  |  |  | 2.81 (1.71-4.47) |
|  |  |  | <0.001 |
| PA positive (N=435, 1.5%) | 33 (26-40) | 22.86 (17.12-32.19) | 3.03 (1.93-4.83) | 1st trimester |
| PA negative (N=28893) | 32 (26-41) | 22.77 (17.31-32.47) | 3.04 (1.88-4.72) |
| p value | 0.002 | 0.466 | 0.673 |
|  |  |  | 2.81 (1.76-5.16) | 3rd trimester |
|  |  |  | 2.82 (1.71-4.51) |
|  |  |  | 0.741 |
| PPH positive (N=5495,18.7%) | 32 (26-41) | 23.31 (17.63-33.27) | 3.01 (1.86-4.71) | 1st trimester |
| PPH negative (N=23833) | 32 (26-41) | 22.66 (17.26-32.24) | 3.04 (1.88-4.72) |
| p value | <0.001 | <0.001 | 0.036 |
|  |  |  | 2.78 (1.70-4.47) | 3rd trimester |
|  |  |  | 2.83 (1.72-4.53) |
|  |  |  | <0.001 |
|  |  |  |  |  |

**Supplementary Table 3** (continued)

|  |  |  |  |  |
| --- | --- | --- | --- | --- |
| Disease Groups | UA (μmol/L) | Crea (μmol/L) | Cys C (mg/L) |  |
| GH positive (N=1138, 3.9%) | 223.55 (139.74-359.18) | 46.30 (35.90-59.66) | 0.58 (0.43-0.78) | 1st trimester |
| GH negative (N=28190) | 205.10 (131.90-320.60) | 46.20 (35.40-59.00) | 0.57 (0.43-0.75) |
| p value | <0.001 | 0.173 | <0.001 |
| GDM positive (N=4623, 15.8) | 221.10 (140.40-348.82) | 46.40 (35.36-59.70) | 0.58 (0.43-0.77) | 1st trimester |
| GDM negative (N=24705) | 203.20 (131.10-316.00) | 46.20 (35.40-58.90) | 0.57 (0.43-0.75) |
| p value | <0.001 | 0.057 | <0.001 |
| PE positive (N=1467, 5.0%) | 230.90 (145.21-383.87) | 47.20 (35.37-61.33) | 0.60 (0.44-0.80) | 1st trimester |
| PE negative (N=27861) | 204.80 (131.76-317.60) | 46.10 (35.40-58.90) | 0.57 (0.43-0.75) |
| p value | <0.001 | <0.001 | <0.001 |
| ICP positive (N=130, 0.4%) | 209.00 (141.16-350.80) | 47.15 (34.39-57.65) | 0.59 (0.38-0.78) | 1st trimester |
| ICP negative (N=29198) | 205.80 (132.10-322.11) | 46.20 (35.40-59.05) | 0.57 (0.43-0.75) |
| p value | 0.568 | 0.189 | 0.131 |
| PTB positive (N=1314, 4.5%) | 214.50 (130.88-353.10) | 46.40 (35.80-60.93) | 0.59 (0.43-0.78) | 1st trimester |
| PTB negative (N=28014) | 205.40 (132.10-321.06) | 46.20 (35.40-59.00) | 0.58 (0.43-0.75) |
| p value | <0.001 | 0.145 | 0.001 |
|  | 273.95 (167.25-514.41) | 45.80 (33.57-71.05) | 0.91 (0.58-1.58) | 3rd trimester |
|  | 251.80 (164.54-382.66) | 44.70 (33.70-58.90) | 0.84 (0.58-1.28) |
|  | <0.001 | <0.001 | <0.001 |
| FGR positive (N=711, 2.4%) | 208.80 (133.44-322.10) | 47.20 (36.88-60.30) | 0.58 (0.42-0.76) | 1st trimester |
| FGR negative (N=28617) | 205.70 (132.10-322.06) | 46.20 (35.40-59.00) | 0.57 (0.43-0.75) |
| p value | 0.038 | <0.001 | 0.019 |
|  | 270.70 (175.88-481.68) | 47.20 (36.88-60.30) | 0.89 (0.59-1.52) | 3rd trimester |
|  | 252.20 (164.50-386.71) | 44.70 (33.60-59.10) | 0.84 (0.58-1.29) |
|  | <0.001 | <0.001 | <0.001 |
| PA positive (N=435, 1.5%) | 207.60 (139.72-330.02) | 46.00 (35.75-60.94) | 0.85 (0.57-1.36) | 1st trimester |
| PA negative (N=28893) | 205.70 (132.00-322.10) | 44.80 (33.70-59.30) | 0. 85 (0.58-1.29) |
| p value | 0.287 | 0.003 | 0.122 |
|  | 261.10 (165.57-440.15) | 45.46 (32.88-63.03) | 0.85 (0.57-1.36) | 3rd trimester |
|  | 252.50 (164.64-389.87) | 44.80 (33.70-59.30) | 0. 85 (0.58-1.29) |
|  | <0.001 | 0.003 | 0.122 |
| PPH positive (N=5495,18.7%) | 208.60 (134.94-334.56) | 46.10 (35.60-59.56) | 0.58 (0.43-0.76) | 1st trimester |
| PPH negative (N=23833) | 205.10 (131.49-320.10) | 46.20 (35.31-58.90) | 0.57 (0.43-0.75) |
| p value | <0.001 | 0.658 | <0.001 |
|  | 254.30 (165.10-396.36) | 44.50 (33.20-59.30) | 0.87 (0.58-1.33) | 3rd trimester |
|  | 252.20 (164.60-389.80) | 44.81 (33.70-59.40) | 0.84 (0.58-1.29) |
|  | 0.003 | 0.001 | <0.001 |
| All renal function values were presented as median (25th-75th percentile). GH: gestational hypertension; GDM: gestational diabetes mellitus; PE: preeclampsia; ICP: intrahepatic cholestasis of pregnancy; PPH: postpartum hemorrhage. PTB: preterm birth; PA: placental abruption; FGR: fetal growth restriction. BMI: body mass index; BUN, urea nitrogen; UA, uric acid; Crea, creatinine; Cys C, cystatin C. | | | | |

**Supplementary Table 4** Logistic regression analysis of the risk of serum renal function tests during singleton pregnancy for pregnancy complications

|  |  |  |  |  |  |  |  |  |  |  |  | |
| --- | --- | --- | --- | --- | --- | --- | --- | --- | --- | --- | --- | --- |
|  | BUN | |  | UA | |  | Crea | |  | Cys C | | |
| OR (95% CI) | p value |  | OR (95% CI) | p value |  | OR (95% CI) | p value |  | OR (95% CI) | p value | |
| GDMa |  |  |  |  |  |  |  |  |  |  |  | |
| 80% URL | 1.06 (0.99--1.14) | 0.10 |  | 1.76 (1.65--1.89) | <0.01 |  | 0.94 (0.88--1.00) | 0.06 |  | 1.17 (1.10--1.25) | <0.01 | |
| 85% URL | 1.04 (0.96--1.13) | 0.31 |  | 1.81 (1.68--1.94) | <0.01 |  | 0.96 (0.90--1.03) | 0.26 |  | 1.15 (1.07--1.23) | <0.01 | |
| 90% URL | 1.02 (0.93--1.11) | 0.75 |  | 1.83 (1.69--1.98) | <0.01 |  | 0.96 (0.88--1.04) | 0.30 |  | 1.11 (1.02--1.21) | 0.02 | |
| 95% URL | 1.00 (0.89--1.11) | 0.95 |  | 1.88 (1.72--2.06) | <0.01 |  | 1.01 (0.91--1.12) | 0.91 |  | 1.15 (1.03--1.28) | 0.01 | |
| 100% URL | 1.05 (0.92--1.19) | 0.51 |  | 1.94 (1.74--2.15) | <0.01 |  | 0.98 (0.84--1.15) | 0.83 |  | 1.14 (0.99--1.32) | 0.08 | |
| 105% URL | 1.18 (1.00--1.38) | 0.04 |  | 1.80 (1.59--2.04) | <0.01 |  | 1.09 (0.88--1.36) | 0.44 |  | 1.15 (0.93--1.41) | 0.20 | |
| 110% URL | 1.20 (0.99--1.46) | 0.06 |  | 1.90 (1.64--2.19) | <0.01 |  | 0.93 (0.66--1.32) | 0.68 |  | 0.90 (0.67--1.21) | 0.47 | |
| 115% URL | 1.09 (0.84--1.42) | 0.50 |  | 1.91 (1.60--2.27) | <0.01 |  | 0.94 (0.54--1.64) | 0.83 |  | 0.71 (0.45--1.10) | 0.12 | |
| 120% URL | 1.15 (0.84--1.59) | 0.38 |  | 2.12 (1.73--2.59) | <0.01 |  | 1.23 (0.55--2.72) | 0.62 |  | 0.68 (0.40--1.17) | 0.17 | |
| GHa |  |  |  |  |  |  |  |  |  |  |  | |
| 80% URL | 1.20 (1.05--1.37) | 0.01 |  | 1.50 (1.32--1.70) | <0.01 |  | 0.93 (0.82--1.05) | 0.22 |  | 1.13 (1.00--1.28) | 0.04 | |
| 85% URL | 1.26 (1.10--1.46) | <0.01 |  | 1.48 (1.29--1.68) | <0.01 |  | 0.93 (0.82--1.05) | 0.24 |  | 1.12 (0.98--1.27) | 0.10 | |
| 90% URL | 1.26 (1.07--1.48) | 0.01 |  | 1.56 (1.35--1.79) | <0.01 |  | 0.95 (0.81--1.10) | 0.46 |  | 1.09 (0.93--1.28) | 0.28 | |
| 95% URL | 1.26 (1.04--1.53) | 0.02 |  | 1.61 (1.38--1.88) | <0.01 |  | 0.99 (0.82--1.20) | 0.92 |  | 1.15 (0.95--1.38) | 0.15 | |
| 100% URL | 1.23 (0.96--1.56) | 0.10 |  | 1.51 (1.27--1.81) | <0.01 |  | 0.84 (0.63--1.13) | 0.26 |  | 1.15 (0.89--1.48) | 0.29 | |
| 105% URL | 1.29 (0.96--1.72) | 0.09 |  | 1.47 (1.19--1.81) | <0.01 |  | 1.01 (0.67--1.51) | 0.98 |  | 1.23 (0.87--1.75) | 0.25 | |
| 110% URL | 1.18 (0.81--1.71) | 0.39 |  | 1.33 (1.04--1.71) | 0.02 |  | 1.16 (0.66--2.06) | 0.60 |  | 1.19 (0.74--1.91) | 0.48 | |
| 115% URL | 1.24 (0.76--2.00) | 0.39 |  | 1.28 (0.95--1.73) | 0.11 |  | 0.85 (0.31--2.34) | 0.75 |  | 1.36 (0.74--2.49) | 0.32 | |
| 120% URL | 1.41 (0.80--2.49) | 0.23 |  | 1.24 (0.87--1.76) | 0.23 |  | 0.48 (0.07--3.57) | 0.48 |  | 1.00 (0.43--2.31) | 1.00 | |
| ICPa |  |  |  |  |  |  |  |  |  |  |  | |
| 80% URL | 1.61 (1.13--2.31) | 0.01 |  | 1.08 (0.74--1.58) | 0.70 |  | 1.27 (0.89--1.82) | 0.18 |  | 1.35 (0.95--1.92) | 0.09 | |
| 85% URL | 1.23 (0.82--1.85) | 0.32 |  | 1.04 (0.68--1.59) | 0.86 |  | 1.38 (0.96--1.97) | 0.08 |  | 1.40 (0.97--2.01) | 0.07 | |
| 90% URL | 1.27 (0.80--2.01) | 0.32 |  | 1.30 (0.82--2.05) | 0.26 |  | 1.18 (0.78--1.81) | 0.43 |  | 1.51 (0.98--2.32) | 0.06 | |
| 95% URL | 1.17 (0.67--2.04) | 0.59 |  | 1.38 (0.81--2.33) | 0.23 |  | 1.07 (0.60--1.91) | 0.81 |  | 1.36 (0.79--2.33) | 0.27 | |
| 100% URL | 1.30 (0.68--2.50) | 0.42 |  | 1.06 (0.53--2.12) | 0.87 |  | 0.53 (0.17--1.68) | 0.28 |  | 1.49 (0.72--3.06) | 0.28 | |
| 105% URL | 1.43 (0.67--3.09) | 0.36 |  | 1.25 (0.58--2.73) | 0.57 |  | 0.42 (0.06--2.99) | 0.38 |  | 2.05 (0.83--5.04) | 0.12 | |
| 110% URL | 1.58 (0.64--3.88) | 0.32 |  | 1.33 (0.53--3.30) | 0.54 |  | 1.04 (0.14--7.49) | 0.97 |  | 0.70 (0.10--5.05) | 0.73 | |
| 115% URL | 1.62 (0.51--5.13) | 0.41 |  | 1.19 (0.37--3.80) | 0.77 |  | 2.69 (0.37--19.52) | 0.33 |  | 0 | 0.98 | |
| 120% URL | 0.84 (0.12--6.02) | 0.86 |  | 1.76 (0.55--5.65) | 0.34 |  | 6.66 (0.90--49.05) | 0.06 |  | 0 | 0.98 | |
| PEa |  |  |  |  |  |  |  |  |  |  |  | |
| 80% URL | 1.17 (1.10--1.25) | <0.01 |  | 1.76 (1.57--1.97) | <0.01 |  | 1.11 (1.00--1.24) | 0.06 |  | 1.51 (1.35--1.68) | <0.01 | |
| 85% URL | 1.15 (1.07--1.23) | <0.01 |  | 1.82 (1.62--2.04) | <0.01 |  | 1.16 (1.04--1.30) | 0.01 |  | 1.57 (1.41--1.76) | <0.01 | |
| 90% URL | 1.11 (1.02--1.21) | 0.02 |  | 1.92 (1.70--2.17) | <0.01 |  | 1.18 (1.04--1.34) | 0.01 |  | 1.62 (1.42--1.84) | <0.01 | |
| 95% URL | 1.15 (1.03--1.28) | 0.01 |  | 1.99 (1.74--2.27) | <0.01 |  | 1.22 (1.04--1.44) | 0.01 |  | 1.68 (1.45--1.96) | <0.01 | |
| 100% URL | 1.14 (0.99--1.32) | 0.08 |  | 2.09 (1.81--2.43) | <0.01 |  | 1.42 (1.15--1.77) | <0.01 |  | 1.83 (1.51--2.22) | <0.01 | |
| 105% URL | 1.15 (0.93--1.41) | 0.20 |  | 2.35 (1.99--2.77) | <0.01 |  | 1.82 (1.36--2.43) | <0.01 |  | 1.75 (1.32--2.31) | <0.01 | |
| 110% URL | 0.90 (0.67--1.21) | 0.47 |  | 2.51 (2.08--3.02) | <0.01 |  | 2.04 (1.35--3.09) | <0.01 |  | 1.80 (1.25--2.60) | <0.01 | |
| 115% URL | 0.71 (0.45--1.10) | 0.12 |  | 2.40 (1.93--3.00) | <0.01 |  | 3.08 (1.75--5.42) | <0.01 |  | 2.00 (1.24--3.22) | <0.01 | |
| 120% URL | 0.68 (0.40--1.17) | 0.17 |  | 2.64 (2.05--3.38) | <0.01 |  | 4.48 (2.04--9.82) | <0.01 |  | 2.07 (1.17--3.66) | 0.01 | |
| a: first trimester; OR: odds ratio; CI: confidence interval; URL: upper reference interval limit; GDM: gestational diabetes mellitus; GH: gestational hypertension; ICP: intrahepatic cholestasis of pregnancy; PE: preeclampsia; BUN, blood urea nitrogen; UA, uric acid; Crea, creatinine; Cys C, cystatin C. | | | | | | | | | | | |

**Supplementary Table 5** Logistic regression analysis of the risk of serum renal function tests during singleton pregnancy for adverse perinatal outcomes

|  |  |  |  |  |  |  |  |  |  |  |  | |
| --- | --- | --- | --- | --- | --- | --- | --- | --- | --- | --- | --- | --- |
|  | BUN | |  | UA | |  | Crea | |  | Cys C | | |
| OR (95% CI) | p value |  | OR (95% CI) | p value |  | OR (95% CI) | p value |  | OR (95% CI) | p value | |
| PTBa |  |  |  |  |  |  |  |  |  |  |  | |
| 80% URL | 0.95 (0.84--1.08) | 0.44 |  | 1.39 (1.24--1.57) | <0.01 |  | 1.01 (0.90--1.13) | 0.87 |  | 1.12 (1.00--1.26) | 0.04 | |
| 85% URL | 1.00 (0.87--1.15) | 0.97 |  | 1.44 (1.27--1.63) | <0.01 |  | 1.01 (0.90--1.14) | 0.86 |  | 1.12 (0.99--1.26) | 0.07 | |
| 90% URL | 1.00 (0.85--1.17) | 0.95 |  | 1.42 (1.24--1.64) | <0.01 |  | 1.01 (0.88--1.16) | 0.86 |  | 1.18 (1.02--1.37) | 0.03 | |
| 95% URL | 1.09 (0.90--1.31) | 0.37 |  | 1.52 (1.30--1.78) | <0.01 |  | 1.04 (0.87--1.25) | 0.65 |  | 1.35 (1.13--1.60) | <0.01 | |
| 100% URL | 1.16 (0.93--1.44) | 0.20 |  | 1.71 (1.43--2.04) | <0.01 |  | 1.07 (0.82--1.39) | 0.61 |  | 1.51 (1.20--1.89) | <0.01 | |
| 105% URL | 1.07 (0.81--1.42) | 0.63 |  | 1.65 (1.33--2.04) | <0.01 |  | 1.52 (1.09--2.13) | 0.01 |  | 1.72 (1.26--2.34) | <0.01 | |
| 110% URL | 1.17 (0.84--1.63) | 0.37 |  | 1.88 (1.48--2.39) | <0.01 |  | 1.99 (1.26--3.14) | <0.01 |  | 1.78 (1.19--2.66) | <0.01 | |
| 115% URL | 1.22 (0.80--1.87) | 0.36 |  | 1.95 (1.47--2.58) | <0.01 |  | 2.48 (1.28--4.80) | 0.01 |  | 2.53 (1.56--4.10) | <0.01 | |
| 120% URL | 1.63 (1.02--2.62) | 0.04 |  | 2.19 (1.59--3.01) | <0.01 |  | 5.49 (2.50--12.05) | <0.01 |  | 2.94 (1.70--5.10) | <0.01 | |
| PTBb |  |  |  |  |  |  |  |  |  |  |  | |
| 80% URL | 1.91 (1.69--2.15) | <0.01 |  | 2.04 (1.82--2.28) | <0.01 |  | 1.26 (1.12--1.40) | <0.01 |  | 2.04 (1.82--2.29) | <0.01 | |
| 85% URL | 2.05 (1.79--2.34) | <0.01 |  | 2.25 (2.00--2.53) | <0.01 |  | 1.41 (1.25--1.59) | <0.01 |  | 2.31 (2.06--2.60) | <0.01 | |
| 90% URL | 2.57 (2.22--2.97) | <0.01 |  | 2.65 (2.34--3.00) | <0.01 |  | 1.59 (1.39--1.82) | <0.01 |  | 2.47 (2.18--2.81) | <0.01 | |
| 95% URL | 3.25 (2.78--3.81) | <0.01 |  | 3.34 (2.93--3.82) | <0.01 |  | 2.07 (1.77--2.42) | <0.01 |  | 2.81 (2.44--3.24) | <0.01 | |
| 100% URL | 4.25 (3.56--5.06) | <0.01 |  | 3.93 (3.39--4.55) | <0.01 |  | 2.79 (2.31--3.36) | <0.01 |  | 3.33 (2.84--3.90) | <0.01 | |
| 105% URL | 5.38 (4.41--6.56) | <0.01 |  | 5.04 (4.29--5.93) | <0.01 |  | 4.33 (3.46--5.41) | <0.01 |  | 3.46 (2.88--4.17) | <0.01 | |
| 110% URL | 6.70 (5.33--8.42) | <0.01 |  | 5.86 (4.88--7.03) | <0.01 |  | 7.30 (5.54--9.63) | <0.01 |  | 4.00 (3.22--4.96) | <0.01 | |
| 115% URL | 9.10 (7.00--11.84) | <0.01 |  | 6.99 (5.68--8.59) | <0.01 |  | 10.02 (7.13--14.08) | <0.01 |  | 5.19 (4.08--6.61) | <0.01 | |
| 120% URL | 13.61 (10.09--18.37) | <0.01 |  | 8.68 (6.87--10.98) | <0.01 |  | 15.81 (10.45--23.93) | <0.01 |  | 5.58 (4.24--7.34) | <0.01 | |
| PPHa |  |  |  |  |  |  |  |  |  |  |  | |
| 80% URL | 0.93 (0.87--0.99) | 0.03 |  | 1.04 (0.97--1.11) | 0.25 |  | 0.94 (0.88--1.00) | 0.03 |  | 1.08 (1.02--1.15) | 0.01 | |
| 85% URL | 0.96 (0.89--1.03) | 0.27 |  | 1.07 (0.99--1.15) | 0.07 |  | 0.94 (0.89--1.01) | 0.08 |  | 1.09 (1.02--1.16) | 0.01 | |
| 90% URL | 0.97 (0.89--1.06) | 0.51 |  | 1.06 (0.98--1.15) | 0.13 |  | 0.97 (0.90--1.05) | 0.49 |  | 1.08 (1.00--1.17) | 0.05 | |
| 95% URL | 0.95 (0.85--1.05) | 0.33 |  | 1.11 (1.01--1.21) | 0.03 |  | 1.02 (0.92--1.12) | 0.72 |  | 1.06 (0.95--1.17) | 0.30 | |
| 100% URL | 0.95 (0.83--1.08) | 0.41 |  | 1.11 (1.00--1.24) | 0.05 |  | 1.15 (1.00--1.33) | 0.04 |  | 1.06 (0.92--1.22) | 0.39 | |
| 105% URL | 0.98 (0.83--1.15) | 0.79 |  | 1.12 (0.98--1.27) | 0.09 |  | 1.16 (0.95--1.43) | 0.15 |  | 0.98 (0.79--1.20) | 0.81 | |
| 110% URL | 1.01 (0.83--1.23) | 0.90 |  | 1.20 (1.03--1.40) | 0.02 |  | 1.25 (0.92--1.71) | 0.16 |  | 0.89 (0.67--1.18) | 0.42 | |
| 115% URL | 1.08 (0.84--1.39) | 0.54 |  | 1.21 (1.01--1.45) | 0.04 |  | 1.54 (0.97--2.45) | 0.07 |  | 0.90 (0.61--1.33) | 0.60 | |
| 120% URL | 0.98 (0.71--1.35) | 0.91 |  | 1.25 (1.00--1.54) | 0.05 |  | 1.86 (0.94--3.70) | 0.08 |  | 0.89 (0.55--1.42) | 0.62 | |
| PPHb |  |  |  |  |  |  |  |  |  |  |  | |
| 80% URL | 0.91 (0.85--0.99) | 0.02 |  | 1.05 (0.98--1.12) | 0.16 |  | 0.88 (0.83--0.94) | <0.01 |  | 1.29 (1.21--1.37) | <0.01 | |
| 85% URL | 0.90 (0.83--0.99) | 0.03 |  | 1.04 (0.97--1.12) | 0.29 |  | 0.92 (0.86--0.98) | 0.01 |  | 1.33 (1.24--1.43) | <0.01 | |
| 90% URL | 0.91 (0.81--1.01) | 0.07 |  | 1.08 (0.99--1.17) | 0.08 |  | 0.94 (0.86--1.02) | 0.12 |  | 1.37 (1.26--1.48) | <0.01 | |
| 95% URL | 0.90 (0.79--1.02) | 0.10 |  | 1.10 (1.00--1.21) | 0.05 |  | 0.91 (0.82--1.02) | 0.10 |  | 1.36 (1.23--1.50) | <0.01 | |
| 100% URL | 0.83 (0.70--0.97) | 0.02 |  | 1.12 (0.99--1.25) | 0.06 |  | 0.89 (0.77--1.04) | 0.13 |  | 1.40 (1.25--1.57) | <0.01 | |
| 105% URL | 0.85 (0.69--1.04) | 0.12 |  | 1.07 (0.93--1.23) | 0.35 |  | 0.90 (0.73--1.11) | 0.32 |  | 1.39 (1.20--1.60) | <0.01 | |
| 110% URL | 0.95 (0.74--1.21) | 0.65 |  | 1.03 (0.87--1.23) | 0.73 |  | 0.72 (0.52--1.01) | 0.06 |  | 1.35 (1.13--1.62) | <0.01 | |
| 115% URL | 1.01 (0.75--1.36) | 0.95 |  | 1.04 (0.85--1.29) | 0.68 |  | 0.71 (0.46--1.11) | 0.14 |  | 1.38 (1.11--1.71) | <0.01 | |
| 120% URL | 0.90 (0.62--1.31) | 0.59 |  | 1.13 (0.88--1.44) | 0.35 |  | 0.80 (0.46--1.40) | 0.44 |  | 1.50 (1.17--1.92) | <0.01 | |
| PAa | | | | | | | | | | | |
| 80% URL | 0.93 (0.75--1.16) | 0.54 |  | 1.12 (0.91--1.37) | 0.29 |  | 0.91 (0.75--1.10) | 0.33 |  | 1.02 (0.84--1.23) | 0.88 | |
| 85% URL | 0.93 (0.73--1.19) | 0.57 |  | 1.10 (0.88--1.38) | 0.40 |  | 1.06 (0.87--1.30) | 0.56 |  | 0.99 (0.80--1.22) | 0.90 | |
| 90% URL | 1.05 (0.80--1.37) | 0.74 |  | 1.11 (0.86--1.44) | 0.41 |  | 1.16 (0.92--1.46) | 0.22 |  | 0.98 (0.75--1.28) | 0.91 | |
| 95% URL | 1.02 (0.74--1.41) | 0.90 |  | 1.21 (0.90--1.61) | 0.20 |  | 1.06 (0.78--1.45) | 0.71 |  | 1.17 (0.86--1.60) | 0.31 | |
| 100% URL | 0.68 (0.42--1.10) | 0.11 |  | 1.19 (0.84--1.68) | 0.32 |  | 1.21 (0.79--1.86) | 0.37 |  | 1.36 (0.91--2.03) | 0.14 | |
| 105% URL | 0.79 (0.45--1.38) | 0.40 |  | 1.57 (1.09--2.27) | 0.02 |  | 1.58 (0.90--2.77) | 0.11 |  | 1.60 (0.93--2.75) | 0.09 | |
| 110% URL | 1.14 (0.64--2.04) | 0.65 |  | 1.43 (0.91--2.25) | 0.12 |  | 3.01 (1.58--5.74) | <0.01 |  | 1.41 (0.66--3.01) | 0.37 | |
| 115% URL | 1.32 (0.65--2.69) | 0.44 |  | 1.19 (0.66--2.14) | 0.57 |  | 3.00 (1.09--8.23) | 0.03 |  | 2.39 (1.05--5.43) | 0.04 | |
| 120% URL | 1.30 (0.53--3.18) | 0.56 |  | 0.84 (0.37--1,90) | 0.67 |  | 5.64 (1.72--18.43) | <0.01 |  | 2.90 (1.18--7.15) | 0.02 | |
| PAb |  |  |  |  |  |  |  |  |  |  |  | |
| 80% URL | 1.10 (0.87--1.40) | 0.41 |  | 1.40 (1.15--1.70) | <0.01 |  | 1.15 (0.95--1.40) | 0.15 |  | 1.24 (1.01--1.53) | 0.04 | |
| 85% URL | 1.15 (0.88--1.50) | 0.30 |  | 1.53 (1.24--1.89) | <0.01 |  | 1.29 (1.05--1.58) | 0.02 |  | 1.25 (1.00--1.56) | 0.05 | |
| 90% URL | 1.24 (0.91--1.68) | 0.18 |  | 1.81 (1.44--2.27) | <0.01 |  | 1.39 (1.10--1.76) | 0.01 |  | 1.23 (0.95--1.60) | 0.11 | |
| 95% URL | 1.14 (0.78--1.68) | 0.49 |  | 1.91 (1.48--2.47) | <0.01 |  | 1.73 (1.31--2.29) | <0.01 |  | 1.40 (1.04--1.87) | 0.02 | |
| 100% URL | 1.50 (0.99--2.27) | 0.06 |  | 2.08 (1.55--2.78) | <0.01 |  | 1.75 (1.21--2.54) | <0.01 |  | 1.55 (1.11--2.17) | 0.01 | |
| 105% URL | 1.98 (1.25--3.12) | <0.01 |  | 2.01 (1.41--2.86) | <0.01 |  | 2.03 (1.25--3.28) | <0.01 |  | 1.34 (0.87--2.07) | 0.19 | |
| 110% URL | 2.30 (1.36--3.89) | <0.01 |  | 2.42 (1.63--3.57) | <0.01 |  | 2.69 (1.46--4.95) | <0.01 |  | 1.44 (0.86--2.43) | 0.17 | |
| 115% URL | 2.86 (1.59--5.14) | <0.01 |  | 2.64 (1.68--4.13) | <0.01 |  | 3.00 (1.40--6.45) | <0.01 |  | 1.61 (0.88--2.96) | 0.12 | |
| 120% URL | 2.83 (1.38--5.79) | <0.01 |  | 2.97 (1.78--4.96) | <0.01 |  | 3.66 (1.48--9.06) | <0.01 |  | 1.81 (0.93--3.53) | 0.08 | |
| FGRb |  |  |  |  |  |  |  |  |  |  |  | |
| 80% URL | 1.16 (0.98--1.37) | 0.08 |  | 1.22 (1.04--1.43) | 0.02 |  | 1.34 (1.15--1.56) | <0.01 |  | 1.24 (1.06--1.44) | 0.01 | |
| 85% URL | 1.19 (1.00--1.43) | 0.06 |  | 1.21 (1.01--1.45) | 0.03 |  | 1.37 (1.18--1.60) | <0.01 |  | 1.32 (1.13--1.55) | <0.01 | |
| 90% URL | 1.31 (1.07--1.61) | 0.01 |  | 1.21 (0.99--1.48) | 0.07 |  | 1.32 (1.11--1.58) | <0.01 |  | 1.29 (1.06--1.57) | 0.01 | |
| 95% URL | 1.35 (1.07--1.71) | 0.01 |  | 1.22 (0.96--1.55) | 0.10 |  | 1.27 (1.00--1.61) | 0.05 |  | 1.22 (0.95--1.56) | 0.12 | |
| 100% URL | 1.28 (0.96--1.71) | 0.10 |  | 1.28 (0.97--1.69) | 0.08 |  | 1.47 (1.06--2.02) | 0.02 |  | 1.17 (0.82--1.66) | 0.39 | |
| 105% URL | 1.17 (0.81--1.70) | 0.40 |  | 1.14 (0.80--1.62) | 0.47 |  | 1.58 (0.99--2.51) | 0.06 |  | 0.90 (0.50--1.60) | 0.72 | |
| 110% URL | 1.22 (0.77--1.91) | 0.40 |  | 1.26 (0.84--1.89) | 0.26 |  | 0.80 (0.30--2.16) | 0.66 |  | 0.95 (0.45--2.02) | 0.89 | |
| 115% URL | 1.38 (0.79--2.41) | 0.26 |  | 1.40 (0.88--2.24) | 0.16 |  | 0.49 (0.07--3.54) | 0.48 |  | 1.31 (0.54--3.21) | 0.55 | |
| 120% URL | 2.03 (1.13--3.65) | 0.02 |  | 1.74 (1.04--2.90) | 0.03 |  | 1.18 (0.16--8.65) | 0.87 |  | 1.12 (0.35--3.53) | 0.85 | |
| FGRb | | | | | | | | | | | |
| 80% URL | 2.61 (2.24--3.06) | <0.01 |  | 1.84 (1.58--2.14) | <0.01 |  | 1.79 (1.54--2.08) | <0.01 |  | 1.68 (1.44--1.96) | <0.01 | |
| 85% URL | 3.01 (2.55--3.55) | <0.01 |  | 2.06 (1.76--2.41) | <0.01 |  | 1.92 (1.65--2.24) | <0.01 |  | 1.67 (1.42--1.97) | <0.01 | |
| 90% URL | 3.31 (2.76--3.96) | <0.01 |  | 2.42 (2.04--2.86) | <0.01 |  | 2.10 (1.77--2.49) | <0.01 |  | 1.83 (1.53--2.20) | <0.01 | |
| 95% URL | 4.24 (3.49--5.14) | <0.01 |  | 3.01 (2.51--3.61) | <0.01 |  | 2.51 (2.06--3.07) | <0.01 |  | 1.97 (1.60--2.41) | <0.01 | |
| 100% URL | 4.95 (3.98--6.16) | <0.01 |  | 3.51 (2.87--4.29) | <0.01 |  | 3.10 (2.43--3.95) | <0.01 |  | 2.10 (1.66--2.66) | <0.01 | |
| 105% URL | 5.07 (3.91--6.57) | <0.01 |  | 4.34 (3.48--5.40) | <0.01 |  | 4.46 (3.34--5.96) | <0.01 |  | 2.58 (1.98--3.35) | <0.01 | |
| 110% URL | 5.45 (4.02--7.40) | <0.01 |  | 5.08 (3.98--6.50) | <0.01 |  | 6.13 (4.27--8.82) | <0.01 |  | 2.90 (2.14--3.95) | <0.01 | |
| 115% URL | 6.74 (4.76--9.54) | <0.01 |  | 5.90 (4.48--7.78) | <0.01 |  | 9.54 (6.33--14.40) | <0.01 |  | 2.98 (2.06--4.30) | <0.01 | |
| 120% URL | 9.93 (6.84--14.42) | <0.01 |  | 6.62 (4.83--9.07) | <0.01 |  | 9.73 (5.78--16.36) | <0.01 |  | 3.01 (1.97--4.60) | <0.01 | |
| a: first trimester; b: third trimester; OR: odds ratio; CI: confidence interval; URL: upper reference interval limit; PTB: preterm birth; PPH: postpartum hemorrhage; PA: placental abruption; FGR: fetal growth restriction; BUN, blood urea nitrogen; UA, uric acid; Crea, creatinine; Cys C, cystatin C. | | | | | | | | | | | |

**Supplementary Table 6** Logistic regression analysis of the risk of serum renal function tests during twin pregnancy for pregnancy complications

|  |  |  |  |  |  |  |  |  |  |  |  |
| --- | --- | --- | --- | --- | --- | --- | --- | --- | --- | --- | --- |
|  | BUN | |  | UA | |  | Crea | |  | Cys C | |
| OR (95% CI) | p value |  | OR (95% CI) | p value |  | OR (95% CI) | p value |  | OR (95% CI) | p value |
| GDMa |  |  |  |  |  |  |  |  |  |  |  |
| 80% URL | 1.37 (0.86--2.19) | 0.19 |  | 2.16 (1.50--3.11) | <0.01 |  | 1.00 (0.70--1.42) | 1.00 |  | 1.03 (0.72--1.46) | 0.89 |
| 85% URL | 1.78 (1.04--3.03) | 0.03 |  | 1.80 (1.23--2.65) | <0.01 |  | 0.97 (0.67--1.40) | 0.85 |  | 1.11 (0.75--1.62) | 0.60 |
| 90% URL | 2.13 (1.13--4.00) | 0.02 |  | 2.04 (1.34--3.10) | <0.01 |  | 1.32 (0.87--2.00) | 0.18 |  | 1.25 (0.78--1.98) | 0.36 |
| 95% URL | 1.62 (0.69--3.78) | 0.27 |  | 2.33 (1.46--3.71) | <0.01 |  | 1.54 (0.93--2.54) | 0.09 |  | 1.20 (0.69--2.10) | 0.52 |
| 100% URL | 1.35 (0.47--3.88) | 0.57 |  | 2.59 (1.56--4.31) | <0.01 |  | 1.79 (0.90--3.56) | 0.10 |  | 0.90 (0.40--2.03) | 0.80 |
| 105% URL | 1.74 (0.44--6.86) | 0.43 |  | 2.10 (1.15--3.81) | 0.02 |  | 2.39 (0.91--6.33) | 0.08 |  | 0.94 (0.30--2.92) | 0.92 |
| 110% URL | 2.04 (0.37--11.32) | 0.42 |  | 2.01 (1.01--4.02) | 0.05 |  | 2.49 (0.69--8.99) | 0.16 |  | 0.77 (0.16--3.78) | 0.75 |
| 115% URL | 0 | 0.99 |  | 2.77 (1.19--6.45) | 0.02 |  | 1.72 (0.15--19.38) | 0.66 |  | 1.36 (0.24--7.80) | 0.73 |
| 120% URL | 0 | 0.99 |  | 3.32 (1.17--9.45) | 0.02 |  | 3.06 (0.19--49.98) | 0.43 |  | 2.59 (0.35--19.47) | 0.35 |
| GHa |  |  |  |  |  |  |  |  |  |  |  |
| 80% URL | 1.51 (0.77--2.95) | 0.23 |  | 1.63 (0.96--2.76) | 0.07 |  | 0.90 (0.54--1.51) | 0.70 |  | 1.17 (0.70--1.96) | 0.55 |
| 85% URL | 1.47 (0.67--3.25) | 0.33 |  | 2.34 (1.37--3.99) | <0.01 |  | 1.22 (0.72--2.07) | 0.46 |  | 0.97 (0.55--1.71) | 0.91 |
| 90% URL | 1.09 (0.37--3.16) | 0.88 |  | 1.97 (1.11--3.50) | 0.02 |  | 1.46 (0.82--2.60) | 0.20 |  | 1.17 (0.60--2.28) | 0.65 |
| 95% URL | 0 | 0.98 |  | 1.34 (0.68--2.64) | 0.39 |  | 1.36 (0.66--2.78) | 0.41 |  | 1.35 (0.63--2.89) | 0.44 |
| 100% URL | 0 | 0.98 |  | 1.32 (0.63--2.77) | 0.47 |  | 1.45 (0.54--3.87) | 0.46 |  | 1.81 (0.71--4.63) | 0.21 |
| 105% URL | 0 | 0.99 |  | 1.40 (0.61--3.20) | 0.43 |  | 2.16 (0.60--7.81) | 0.24 |  | 0.49 (0.06--3.82) | 0.50 |
| 110% URL | 0 | 0.99 |  | 2.21 (0.94--5.19) | 0.07 |  | 1.14 (0.14--9.23) | 0.90 |  | 0.82 (0.10--6.85) | 0.86 |
| 115% URL | 0 | 0.99 |  | 3.10 (1.16--8.31) | 0.02 |  | 0 | 0.99 |  | 1.34 (0.14--12.56) | 0.80 |
| 120% URL | 0 | 0.99 |  | 2.13 (0.57--7.94) | 0.26 |  | 0 | 0.99 |  | 0 | 0.99 |
| ICPa |  |  |  |  |  |  |  |  |  |  |  |
| 80% URL | 1.69 (0.66--4.30) | 0.27 |  | 1.05 (0.45--2.43) | 0.91 |  | 2.17 (0.95--4.93) | 0.06 |  | 0.70 (0.32--1.56) | 0.38 |
| 85% URL | 1.18 (0.34--4.02) | 0.80 |  | 0.76 (0.28--2.09) | 0.60 |  | 2.01 (0.92--4.37) | 0.08 |  | 0.45 (0.15--1.31) | 0.14 |
| 90% URL | 1.25 (0.29--5.47) | 0.77 |  | 0.40 (0.09--1.72) | 0.22 |  | 1.80 (0.77--4.21) | 0.18 |  | 0 | 0.95 |
| 95% URL | 1.02 (0.13--7.88) | 0.98 |  | 0.61 (0.14--2.71) | 0.52 |  | 2.44 (0.95--6.26) | 0.06 |  | 0 | 0.96 |
| 100% URL | 1.52 (0.19--12.04) | 0.69 |  | 0.40 (0.05--3.04) | 0.37 |  | 3.93 (1.25--12.36) | 0.02 |  | 0 | 0.97 |
| 105% URL | 3.04 (0.37--25.21) | 0.30 |  | 0.60 (0.08--4.69) | 0.63 |  | 1.81 (0.23--14.37) | 0.58 |  | 0 | 0.98 |
| 110% URL | 5.39 (0.60--48.65) | 0.13 |  | 0.92 (0.12--7.28) | 0.94 |  | 0 | 0.99 |  | 0 | 0.99 |
| 115% URL | 0 | 0.99 |  | 1.65 (0.21--13.27) | 0.64 |  | 0 | 0.99 |  | 0 | 0.99 |
| 120% URL | 0 | 0.99 |  | 2.85 (0.34--23.66) | 0.33 |  | 0 | 0.99 |  | 0 | 0.99 |
| PEa |  |  |  |  |  |  |  |  |  |  |  |
| 80% URL | 1.20 (0.71--2.04) | 0.50 |  | 1.10 (0.74--1.65) | 0.63 |  | 1.05 (0.72--1.54) | 0.79 |  | 0.99 (0.67--1.44) | 0.95 |
| 85% URL | 0.72 (0.35--1.48) | 0.37 |  | 1.11 (0.72--1.71) | 0.64 |  | 0.69 (0.46--1.05) | 0.09 |  | 0.97 (0.64--1.48) | 0.89 |
| 90% URL | 0.77 (0.32--1.87) | 0.57 |  | 1.48 (0.94--2.35) | 0.09 |  | 0.82 (0.51--1.34) | 0.43 |  | 0.83 (0.48--1.44) | 0.51 |
| 95% URL | 0.42 (0.10--1.81) | 0.24 |  | 1.78 (1.08--2.93) | 0.02 |  | 1.06 (0.59--1.89) | 0.85 |  | 0.96 (0.50--1.81) | 0.89 |
| 100% URL | 0.66 (0.15--2.94) | 0.59 |  | 1.82 (1.05--3.16) | 0.03 |  | 0.83 (0.34--2.03) | 0.68 |  | 1.02 (0.43--2.42) | 0.96 |
| 105% URL | 0.65 (0.08--5.23) | 0.69 |  | 1.72 (0.91--3.26) | 0.10 |  | 1.01 (0.29--3.60) | 0.98 |  | 1.24 (0.40--3.85) | 0.71 |
| 110% URL | 1.22 (0.14--10.66) | 0.86 |  | 1.56 (0.74--3.29) | 0.24 |  | 1.24 (0.26--5.99) | 0.79 |  | 0.43 (0.05--3.50) | 0.43 |
| 115% URL | 2.03 (0.21--19.90) | 0.54 |  | 1.77 (0.71--4.44) | 0.22 |  | 2.40 (0.21--27.36) | 0.48 |  | 0.76 (0.08--6.88) | 0.81 |
| 120% URL | 2.03 (0.21--19.90) | 0.54 |  | 2.10 (0.69--6.38) | 0.19 |  | 6.06 (0.37--99.88) | 0.21 |  | 0 | 0.99 |
| a: first trimester; OR: odds ratio; CI: confidence interval; URL: upper reference interval limit; GDM: gestational diabetes mellitus; GH: gestational hypertension; ICP: intrahepatic cholestasis of pregnancy; PE: preeclampsia; BUN, blood urea nitrogen; UA, uric acid; Crea, creatinine; Cys C, cystatin C. | | | | | | | | | | | |

**Supplementary Table 7** Logistic regression analysis of the risk of serum renal function tests during twin pregnancy for adverse perinatal outcomes

|  | |  |  |  |  |  |  |  |  |  |  |  |  | |
| --- | --- | --- | --- | --- | --- | --- | --- | --- | --- | --- | --- | --- | --- | --- |
|  | | BUN | |  |  | UA | |  | Crea | |  | Cys C | | |
|  | | OR (95% CI) | p value |  |  | OR (95% CI) | p value |  | OR (95% CI) | p value |  | OR (95% CI) | p value | |
| PTBa | |  |  |  |  |  |  |  |  |  |  |  |  | |
| 80% URL | | 1.05 (0.70--1.56) | 0.82 |  |  | 1.53 (1.13--2.06) | 0.01 |  | 1.04 (0.78--1.38) | 0.78 |  | 1.49 (0.95--2.34) | 0.09 | |
| 85% URL | | 0.98 (0.60--1.58) | 0.93 |  |  | 1.67 (1.20--2.33) | <0.01 |  | 1.06 (0.78--1.43) | 0.71 |  | 1.36 (0.79--2.35) | 0.27 | |
| 90% URL | | 1.01 (0.56--1.83) | 0.97 |  |  | 1.80 (1.24--2.60) | <0.01 |  | 1.17 (0.82--1.68) | 0.8 |  | 0.98 (0.48--2.03) | 0.96 | |
| 95% URL | | 0.91 (0.42--1.97) | 0.81 |  |  | 1.83 (1.20--2.80) | 0.01 |  | 1.49 (0.94--2.34) | 0.09 |  | 0.80 (0.30--2.14) | 0.65 | |
| 100% URL | | 1.01 (0.40--2.55) | 0.99 |  |  | 1.75 (1.09--2.82) | 0.02 |  | 0.86 (0.42--1.75) | 0.68 |  | 1.02 (0.33--3.14) | 0.98 | |
| 105% URL | | 1.41 (0.40--4.93) | 0.59 |  |  | 1.62 (0.93--2.81) | 0.09 |  | 1.22 (0.44--3.42) | 0.7 |  | 1.57 (0.40--6.22) | 0.52 | |
| 110% URL | | 1.41 (0.28--7.02) | 0.68 |  |  | 1.56 (0.82--2.98) | 0.18 |  | 1.39 (0.34--5.63) | 0.64 |  | 3.69 (0.73--18.76) | 0.12 | |
| 115% URL | | 0.46 (0.05--4.49) | 0.51 |  |  | 1.73 (0.76--3.96) | 0.19 |  | 2.78 (0.25--30.95) | 0.41 |  | 3.74 (0.52--27.05) | 0.19 | |
| 120% URL | | 0.46 (0.05--4.49) | 0.51 |  |  | 1.66 (0.59--4.66) | 0.34 |  | 1.30 (0.08--21.13) | 0.85 |  | 3.74 (0.52--27.05) | 0.19 | |
| PTBb | |  |  |  |  |  |  |  |  |  |  |  |  | |
| 80% URL | | 1.78 (1.33--2.37) | <0.01 |  |  | 1.59 (1.18--2.14) | <0.01 |  | 0.78 (0.20--3.06) | 0.72 |  | 2.04 (1.45--2.88) | <0.01 | |
| 85% URL | | 1.96 (1.45--2.66) | <0.01 |  |  | 1.65 (1.19--2.28) | <0.01 |  | 0.61 (0.13--2.93) | 0.54 |  | 2.13 (1.49--3.03) | <0.01 | |
| 90% URL | | 2.21 (1.59--3.07) | <0.01 |  |  | 1.98 (1.38--2.84) | <0.01 |  | 0.84 (0.18--4.01) | 0.83 |  | 2.27 (1.57--3.29) | <0.01 | |
| 95% URL | | 1.81 (1.25--2.62) | <0.01 |  |  | 2.18 (1.43--3.34) | <0.01 |  | 1.32 (0.28--6.32) | 0.73 |  | 2.14 (1.42--3.23) | <0.01 | |
| 100% URL | | 2.29 (1.49--3.50) | <0.01 |  |  | 3.00 (1.84--4.91) | <0.01 |  | 1.84 (0.38--8.81) | 0.45 |  | 2.27 (1.44--3.57) | <0.01 | |
| 105% URL | | 2.89 (1.77--4.73) | <0.01 |  |  | 2.62 (1.50--4.57) | <0.01 |  | 1.08 (0.14--8.68) | 0.94 |  | 1.94 (1.16--3.24) | 0.01 | |
| 110% URL | | 4.26 (2.27--7.99) | <0.01 |  |  | 2.12 (1.10--4.08) | 0.02 |  | 0 | 0.97 |  | 2.08 (1.14--3.80) | 0.02 | |
| 115% URL | | 6.39 (2.77--14.78) | <0.01 |  |  | 2.26 (1.04--4.90) | 0.04 |  | 0 | 0.98 |  | 1.96 (0.95--4.04) | 0.07 | |
| 120% URL | | 4.77 (1.89--12.09) | <0.01 |  |  | 4.14 (1.47--11.61) | 0.01 |  | 0 | 0.98 |  | 2.16 (0.93--5.01) | 0.07 | |
| PPHa | |  |  |  |  |  |  |  |  |  |  |  |  | |
| 80% URL | | 0.72 (0.48--1.07) | 0.10 |  |  | 0.90 (0.66--1.21) | 0.48 |  | 0.75 (0.57--1.00) | 0.05 |  | 0.71 (0.48--1.03) | 0.07 | |
| 85% URL | | 1.04 (0.64--1.68) | 0.88 |  |  | 0.86 (0.62--1.19) | 0.37 |  | 1.04 (0.76--1.40) | 0.82 |  | 0.82 (0.54--1.26) | 0.37 | |
| 90% URL | | 1.47 (0.79--2.73) | 0.23 |  |  | 0.95 (0.66--1.38) | 0.80 |  | 0.85 (0.60--1.22) | 0.39 |  | 0.93 (0.58--1.49) | 0.76 | |
| 95% URL | | 1.80 (0.78--4.16) | 0.17 |  |  | 1.04 (0.68--1.59) | 0.87 |  | 0.86 (0.55--1.36) | 0.53 |  | 1.07 (0.63--1.82) | 0.79 | |
| 100% URL | | 1.20 (0.46--3.11) | 0.71 |  |  | 1.00 (0.62--1.61) | 0.99 |  | 0.67 (0.34--1.35) | 0.27 |  | 0.92 (0.50--1.72) | 0.80 | |
| 105% URL | | 1.02 (0.28--3.67) | 0.97 |  |  | 1.09 (0.62--1.91) | 0.76 |  | 0.67 (0.24--1.87) | 0.44 |  | 0.85 (0.40--1.82) | 0.68 | |
| 110% URL | | 1.34 (0.24--7.43) | 0.74 |  |  | 1.03 (0.54--1.98) | 0.92 |  | 0.77 (0.19--3.13) | 0.72 |  | 0.80 (0.33--1.99) | 0.64 | |
| 115% URL | | 0.67 (0.09--4.83) | 0.69 |  |  | 0.87 (0.38--1.99) | 0.74 |  | 0 | 0.98 |  | 0.66 (0.19--2.28) | 0.51 | |
| 120% URL | | 0.67 (0.09--4.83) | 0.69 |  |  | 1.02 (0.36--2.89) | 0.97 |  | 0 | 0.98 |  | 0.33 (0.04--2.58) | 0.29 | |
| PPHb | |  |  |  |  |  |  |  |  |  |  |  |  | |
| 80% URL | | 0.96 (0.72--1.28) | 0.77 |  |  | 0.98 (0.73--1.31) | 0.88 |  | 0.87 (0.22--3.39) | 0.84 |  | 1.12 (0.79--1.60) | 0.53 | |
| 85% URL | | 0.94 (0.69--1.28) | 0.70 |  |  | 1.06 (0.76--1.47) | 0.75 |  | 0.81 (0.17--3.88) | 0.80 |  | 1.43 (0.97--2.09) | 0.07 | |
| 90% URL | | 0.95 (0.69--1.32) | 0.78 |  |  | 1.11 (0.77--1.59) | 0.59 |  | 1.19 (0.25--5.71) | 0.83 |  | 1.31 (0.86--2.00) | 0.22 | |
| 95% URL | | 0.89 (0.61--1.29) | 0.52 |  |  | 0.91 (0.59--1.39) | 0.66 |  | 0.84 (0.10--6.74) | 0.87 |  | 1.18 (0.71--1.96) | 0.52 | |
| 100% URL | | 0.87 (0.57--1.33) | 0.53 |  |  | 0.91 (0.56--1.45) | 0.68 |  | 0 | 0.96 |  | 1.38 (0.80--2.38) | 0.24 | |
| 105% URL | | 0.84 (0.52--1.35) | 0.46 |  |  | 0.86 (0.50--1.49) | 0.60 |  | 0 | 0.97 |  | 1.27 (0.67--2.39) | 0.46 | |
| 110% URL | | 0.83 (0.47--1.47) | 0.53 |  |  | 0.98 (0.51--1.88) | 0.94 |  | 0 | 0.98 |  | 1.04 (0.47--2.32) | 0.93 | |
| 115% URL | | 0.72 (0.37--1.42) | 0.34 |  |  | 1.02 (0.47--2.19) | 0.96 |  | 0 | 0.98 |  | 0.47 (0.14--1.59) | 0.23 | |
| 120% URL | | 0.93 (0.42--2.09) | 0.86 |  |  | 1.06 (0.42--2.69) | 0.90 |  | 0 | 0.98 |  | 0.46 (0.10--2.01) | 0.30 | |
| PAa | |  |  |  |  |  |  |  |  |  |  |  |  | |
| 80% URL | | 2.69 (0.68--10.69) | 0.16 |  |  | 0.22 (0.03--1.79) | 0.16 |  | 1.17 (0.33--4.13) | 0.81 |  | 1.23 (0.87--1.73) | 0.24 | |
| 85% URL | | 2.54 (0.52--12.30) | 0.25 |  |  | 0.37 (0.05--3.04) | 0.36 |  | 1.02 (0.26--4.02) | 0.97 |  | 1.41 (0.99--2.02) | 0.06 | |
| 90% URL | | 4.34 (0.88--21.31) | 0.07 |  |  | 0.57 (0.07--4.69) | 0.60 |  | 2.08 (0.53--8.20) | 0.3 |  | 1.31 (0.85--2.00) | 0.22 | |
| 95% URL | | 3.34 (0.40--27.77) | 0.26 |  |  | 0.86 (0.10--7.27) | 0.89 |  | 2.43 (0.50--11.80) | 0.27 |  | 1.28 (0.33--3.14) | 0.98 | |
| 100% URL | | 0 | 0.98 |  |  | 1.24 (0.15--10.65) | 0.84 |  | 0 | 0.98 |  | 1.57 (0.71--3.48) | 0.26 | |
| 105% URL | | 0 | 0.99 |  |  | 2.00 (0.22—18.09) | 0.54 |  | 0 | 0.98 |  | 1.08 (0.30--3.92) | 0.91 | |
| 110% URL | | 0 | 0.99 |  |  | 0 | 0.97 |  | 0 | 0.99 |  | 2.70 (0.63--11.57) | 0.18 | |
| 115% URL | | 0 | 0.99 |  |  | 0 | 0.98 |  | 0 | 0.99 |  | 2.33 (0.21--26.06) | 0.49 | |
| 120% URL | | 0 | 0.99 |  |  | 0 | 0.98 |  | 0 | 0.99 |  | 0 | 0.99 | |
| PAb | |  |  |  |  |  |  |  |  |  |  |  |  | |
| 80% URL | | 0.78 (0.20--3.06) | 0.72 |  |  | 0.87 (0.22--3.39) | 0.84 |  | 1.42 (0.41--5.00) | 0.58 |  | 1.75 (1.24--2.46) | <0.01 | |
| 85% URL | | 0.61 (0.13--2.93) | 0.54 |  |  | 0.81 (0.17--3.88) | 0.80 |  | 0.63 (0.13--3.02) | 0.56 |  | 1.96 (1.37--2.80) | <0.01 | |
| 90% URL | | 0.84 (0.18--4.01) | 0.83 |  |  | 1.19 (0.25--5.71) | 0.83 |  | 1.19 (0.25--5.72) | 0.83 |  | 1.62 (1.07--2.44) | 0.02 | |
| 95% URL | | 1.32 (0.28--6.32) | 0.73 |  |  | 0.84 (0.10--6.74) | 0.87 |  | 0 | 0.96 |  | 2.08 (1.31--3.29) | <0.01 | |
| 100% URL | | 1.84 (0.38--8.81) | 0.45 |  |  | 0 | 0.96 |  | 0 | 0.97 |  | 1.51 (0.85--2.69) | 0.16 | |
| 105% URL | | 1.08 (0.14--8.68) | 0.94 |  |  | 0 | 0.97 |  | 0 | 0.97 |  | 1.48 (0.72--3.03) | 0.29 | |
| 110% URL | | 0 | 0.97 |  |  | 0 | 0.98 |  | 0 | 0.98 |  | 1.20 (0.43--3.32) | 0.73 | |
| 115% URL | | 0 | 0.98 |  |  | 0 | 0.98 |  | 0 | 0.99 |  | 1.34 (0.36--5.02) | 0.67 | |
| 120% URL | | 0 | 0.98 |  |  | 0 | 0.98 |  | 0 | 0.99 |  | 2.86 (0.63--13.03) | 0.17 | |
| FGRa | |  |  |  |  |  |  |  |  |  |  |  |  | |
| 80% URL | | 1.49 (0.95--2.34) | 0.09 |  |  | 0.71 (0.48--1.03) | 0.07 |  | 1.25 (0.36--4.37) | 0.73 |  | 1.22 (0.87--1.71) | 0.25 | |
| 85% URL | | 1.36 (0.79--2.35) | 0.27 |  |  | 0.82 (0.54--1.26) | 0.37 |  | 1.84 (0.51--6.63) | 0.35 |  | 1.42 (0.98--2.04) | 0.06 | |
| 90% URL | | 0.98 (0.48--2.03) | 0.96 |  |  | 0.93 (0.58--1.49) | 0.76 |  | 1.60 (0.33--7.75) | 0.56 |  | 1.31 (0.82--2.08) | 0.26 | |
| 95% URL | | 0.80 (0.30--2.14) | 0.65 |  |  | 1.07 (0.63--1.82) | 0.79 |  | 1.20 (0.15--9,83) | 0.87 |  | 1.73 (1.01--2.96) | 0.05 | |
| 100% URL | | 1.02 (0.33--3.14) | 0.98 |  |  | 0.92 (0.50--1.72) | 0.80 |  | 0 | 0.98 |  | 1.82 (0.87--3.80) | 0.11 | |
| 105% URL | | 1.57 (0.40--6.22) | 0.52 |  |  | 0.85 (0.40--1.82) | 0.68 |  | 0 | 0.98 |  | 2.10 (0.77--5.70) | 0.15 | |
| 110% URL | | 3.69 (0.73--18.76) | 0.12 |  |  | 0.80 (0.33--1.99) | 0.64 |  | 0 | 0.99 |  | 1.30 (0.27--6.36) | 0.74 | |
| 115% URL | | 3.74 (0.52--27.05) | 0.19 |  |  | 0.66 (0.19--2.28) | 0.51 |  | 0 | 0.99 |  | 1.19 (0.13--10.65) | 0.88 | |
| 120% URL | | 3.74 (0.52--27.05) | 0.19 |  |  | 0.33 (0.04--2.58) | 0.29 |  | 0 | 0.99 |  | 0 | 0.99 | |
| FGRb | |  |  |  |  |  |  |  |  |  |  |  |  | |
| 80% URL | | 2.04 (1.45--2.88) | <0.01 |  |  | 1.12 (0.79--1.60) | 0.53 |  | 0.71 (0.15--3.38) | 0.67 |  | 1.32 (0.91--1.91) | 0.15 | |
| 85% URL | | 2.13 (1.49--3.03) | <0.01 |  |  | 1.43 (0.97--2.09) | 0.07 |  | 1.03 (0.22--4.94) | 0.97 |  | 1.08 (0.71--1.65) | 0.71 | |
| 90% URL | | 2.27 (1.57--3.29) | <0.01 |  |  | 1.31 (0.86--2.00) | 0.22 |  | 1.45 (0.30--6.97) | 0.64 |  | 0.94 (0.58--1.52) | 0.8 | |
| 95% URL | | 2.14 (1.42--3.23) | <0.01 |  |  | 1.18 (0.71--1.96) | 0.52 |  | 0.96 (0.12--7.80) | 0.97 |  | 1.14 (0.66--1.95) | 0.64 | |
| 100% URL | | 2.27 (1.44--3.57) | <0.01 |  |  | 1.38 (0.80--2.38) | 0.24 |  | 1.52 (0.19--12.38) | 0.7 |  | 1.36 (0.73--2.55) | 0.33 | |
| 105% URL | | 1.94 (1.16--3.24) | 0.01 |  |  | 1.27 (0.67--2.39) | 0.46 |  | 2.30 (0.28--18.81) | 0.44 |  | 1.52 (0.73--3.16) | 0.26 | |
| 110% URL | | 2.08 (1.14--3.80) | 0.02 |  |  | 1.04 (0.47--2.32) | 0.93 |  | 3.80 (0.45--31.70) | 0.22 |  | 2.81 (1.20--6.60) | 0.02 | |
| 115% URL | | 1.96 (0.95--4.04) | 0.07 |  |  | 0.47 (0.14--1.59) | 0.23 |  | 7.26 (0.83--63.35) | 0.07 |  | 2.91 (0.98--8.61) | 0.05 | |
| 120% URL | | 2.16 (0.93--5.01) | 0.07 |  |  | 0.46 (0.10--2.01) | 0.30 |  | 0 | 0.99 |  | 4.79 (1.04--21.99) | 0.04 | |
|  | a: first trimester; b: third trimester; OR: odds ratio; CI: confidence interval; URL: upper reference interval limit; PTB: preterm birth; PPH: postpartum hemorrhage; PA: placental abruption; FGR: fetal growth restriction; BUN, blood urea nitrogen; UA, uric acid; Crea, creatinine; Cys C, cystatin C. | | | | | | | | | | | | |
