# Supplementary material for: Elevated levels of renal function tests conferred increased risks of developing various pregnancy complications and adverse perinatal outcomes: insights from a population-based cohort study
Source: publisher site journal article supplement (doi:10.1515/cclm-2023-0104), 2023-04-04
Supplement: Supplementary file 2 [file j_cclm-2023-0104_suppl_002.docx]

**Legend Supplementary Figure**

**Supplementary Figure 1** The column diagrams of adjusted OR value determined at different

serum renal function test levels of twin pregnancy (n=840) (A) BUN, (B) UA, (C) Crea, (D) Cys

C. a: first trimester; b: third trimester; OR: odds ratio; CI: confidence interval; URL: upper

reference interval limit; GDM: gestational diabetes mellitus; GH: gestational hypertension; ICP: intrahepatic cholestasis of pregnancy; PE: preeclampsia; PTB: preterm birth; PPH: postpartum hemorrhage; PA: placental abruption; FGR: fetal growth restriction; BUN: urea nitrogen; UA: uric acid; Crea: creatinine; Cys C: cystatin C.
